# Supplementary material for: Pressure-dependent kinetics of the o-xylene reaction with OH radicals
Source: Royal Society of Chemistry journal article supplement (doi:10.1039/d2cp00396a), 2022-01-01
Supplement: d2cp00396a1.pdf [file d2cp00396a1.pdf]

## Electronic Supplementary Information

### Pressure-Dependent Kinetics of *o*-Xylene Reaction with OH Radical

Yan Li,<sup>1</sup> Xuan Guo,<sup>1,2</sup> Rui Ming Zhang,<sup>1</sup> Hui Zhang,<sup>1</sup> Xin Zhang,<sup>2,\*</sup> and Xuefei Xu<sup>1,\*</sup>

<sup>1</sup>*Center for Combustion Energy, Department of Energy and Power Engineering, and Key Laboratory for Thermal Science and Power Engineering of Ministry of Education, Tsinghua University, Beijing 100084, China*

<sup>2</sup>*State Key Laboratory of Chemical Resource Engineering, Institute of Materia Medica, College of Science, Beijing University of Chemical Technology, Beijing, 100029, P.R. China*

\*Corresponding authors.

*E-mail* addresses: [xuxuefei@tsinghua.edu.cn](mailto:xuxuefei@tsinghua.edu.cn) (X.X.).

## The Calculation and Usage of Specific-Reaction-Parameter (SRP) scaling factor $\lambda^{\text{SRP}}$ in This Work.

Usually the standard scaling factors parametrized to obtain accurate zero point energies (ZPE) in the F38/10 database<sup>1</sup> are good enough for the stable molecules, but they fail to correct the strong high-frequency anharmonicity of transition states or pre-reactive complexes for some reactions.<sup>2-4</sup> Therefore, for the lowest-energy structures of transition states of the six reaction channels, we firstly used hybrid<sup>5</sup> degeneracy-corrected<sup>6</sup> second-order<sup>7-9</sup> vibrational perturbation theory (HDCVPT2) to calculate the anharmonic vibration frequencies to get anharmonic ZPEs, and then we employed the method proposed by Zheng et al.<sup>3</sup> to determine the corresponding specific-reaction-parameter scaling factor by  $\lambda^{\text{SRP}} = \lambda^{\text{Anh}}\lambda^{\text{H}}$ , where  $\lambda^{\text{Anh}}$  is the ratio of the computed anharmonic ZPE to the harmonic ZPE, and  $\lambda^{\text{H}}$  correcting for the inexactness of the model chemistry is determined by reproducing the accurate harmonic frequencies in the F38/10 database. These scaling factors of frequencies are also used in torsional anharmonicity and dynamics calculations.

We calculated the frequency scaling factors  $\lambda^{\text{SRP}}$  and  $\lambda^{\text{STD}}$  for the transition states of A1-A3 and B1-B3 reactions as shown in **Table S2**. In the calculations of  $\lambda^{\text{Anh}}$ , M08-HX/jul-cc-pVDZ and MPW1K<sup>10</sup>/MG3S were used for hydrogen abstraction (A1-A3) and OH addition reactions (B1-B3), respectively. From the table, we can see that the determined  $\lambda^{\text{SRP}}$  scaling factors for the transition states of hydrogen abstraction reactions are slightly smaller than the standard scaling factor  $\lambda^{\text{STD}}$ , while those of addition reactions are equal to the corresponding  $\lambda^{\text{STD}}$  factor, so we used  $\lambda^{\text{SRP}}$  only for the transition states of A1-A3 reactions. For other species (including all the reactants, complexes, transition states of B1-B3, and products), we used  $\lambda^{\text{STD}}$  to scale the harmonic frequencies.

**Table S1** Calculated  $T_1$  diagnostics by the CCSD/jul-cc-pVTZ//M08-HX/ma-TZVP method.

| structure                                                          | $T_1$ |
|--------------------------------------------------------------------|-------|
| $\cdot\text{OH}$                                                   | 0.008 |
| <i>o</i> -xylene                                                   | 0.010 |
| TS abstraction 1                                                   | 0.021 |
| TS abstraction 2                                                   | 0.022 |
| TS abstraction 3                                                   | 0.022 |
| $\cdot\text{CH}_2\text{C}_6\text{H}_4\text{CH}_3$                  | 0.020 |
| <i>o</i> - $\text{CH}_3\cdot\text{C}_6\text{H}_3\text{CH}_3$       | 0.013 |
| <i>m</i> - $\text{CH}_3\cdot\text{C}_6\text{H}_3\text{CH}_3$       | 0.013 |
| $\text{H}_2\text{O}$                                               | 0.009 |
| TS addition 1                                                      | 0.027 |
| TS addition 2                                                      | 0.026 |
| TS addition 3                                                      | 0.026 |
| $\text{CH}_3\text{C}_6\text{H}_4\text{CH}_3\text{OH}$              | 0.016 |
| <i>o</i> - $\text{CH}_3\text{C}_6\text{H}_4(\text{OH})\text{CH}_3$ | 0.016 |
| <i>m</i> - $\text{CH}_3\text{C}_6\text{H}_4(\text{OH})\text{CH}_3$ | 0.016 |

**Table S2** Scaling factors for transition states.

| Reaction                                                        | Abstraction        |                    |                    |                    | Addition           |                    |
|-----------------------------------------------------------------|--------------------|--------------------|--------------------|--------------------|--------------------|--------------------|
|                                                                 | methyl-            | <i>o</i> -         | <i>m</i> -         | <i>ipso</i> -      | <i>o</i> -         | <i>m</i> -         |
| $\lambda^{\text{STD}}$                                          |                    | 0.979 <sup>a</sup> |                    |                    | 0.983 <sup>b</sup> |                    |
| $\lambda^{\text{H}}$                                            |                    | 0.988 <sup>a</sup> |                    |                    | 0.995 <sup>b</sup> |                    |
| $\lambda^{\text{Anh}}$                                          | 0.988 <sup>a</sup> | 0.989 <sup>a</sup> | 0.987 <sup>a</sup> | 0.988 <sup>c</sup> | 0.987 <sup>c</sup> | 0.987 <sup>c</sup> |
| $\lambda^{\text{SRP}} = \lambda^{\text{Anh}}\lambda^{\text{H}}$ | 0.977              | 0.978              | 0.975              | 0.983              | 0.983              | 0.983              |
| $\lambda^{\text{ZPE}}$ we choose                                | 0.977              | 0.978              | 0.975              | 0.983              | 0.983              | 0.983              |

<sup>a</sup> Calculated by M08-HX/jul-cc-pVDZ method.

<sup>b</sup> Calculated by M08-SO/ma-TZVP method.

<sup>c</sup> Calculated by MPW1K/MG3S method.

**Table S3** Classical forward barrier heights ( $V_f^\ddagger$ ), classical reverse barrier heights ( $V_r^\ddagger$ ) and classical reaction energies ( $\Delta V$ ) (in kcal/mol) of A1-A3 hydrogen abstraction reactions and the mean unsigned deviations (MUD in kcal/mol) against the benchmark results obtained by CCSD(T)-F12b/jul-cc-pVTZ//M08-HX/ma-TZVP.

| Method       | Basis set   | abs-methyl     |                |            | abs- <i>o</i>  |                |            | abs- <i>m</i>  |                |            | MUD         |
|--------------|-------------|----------------|----------------|------------|----------------|----------------|------------|----------------|----------------|------------|-------------|
|              |             | $V_f^\ddagger$ | $V_r^\ddagger$ | $\Delta V$ | $V_f^\ddagger$ | $V_r^\ddagger$ | $\Delta V$ | $V_f^\ddagger$ | $V_r^\ddagger$ | $\Delta V$ |             |
| M06-2X       | jul-cc-pVDZ | 0.28           | 27.05          | -26.77     | 3.92           | 10.59          | -6.67      | 4.75           | 10.95          | -6.20      | 1.17        |
| M08-HX       | jul-cc-pVDZ | 1.14           | 28.64          | -27.50     | 4.87           | 11.03          | -6.16      | 5.69           | 11.40          | -5.72      | <b>0.46</b> |
| M08-SO       | jul-cc-pVDZ | -0.16          | 26.80          | -26.96     | 3.95           | 9.17           | -5.22      | 4.86           | 9.58           | -4.72      | 1.69        |
| M05-2X       | jul-cc-pVDZ | 0.50           | 28.93          | -28.43     | 4.18           | 9.60           | -5.42      | 4.91           | 9.87           | -4.95      | 1.07        |
| MN12-SX      | jul-cc-pVDZ | 0.21           | 28.29          | -28.08     | 5.09           | 12.49          | -7.39      | 5.84           | 12.73          | -6.89      | 0.78        |
| MN12-L       | jul-cc-pVDZ | 0.91           | 28.16          | -27.25     | 6.26           | 13.06          | -6.80      | 7.14           | 13.57          | -6.43      | 1.05        |
| MN15-L       | jul-cc-pVDZ | -0.26          | 27.43          | -27.69     | 5.12           | 11.77          | -6.65      | 6.20           | 12.51          | -6.30      | 0.72        |
| MPW1K        | jul-cc-pVDZ | 0.90           | 26.99          | -26.09     | 5.43           | 9.58           | -4.15      | 6.12           | 9.70           | -3.59      | 1.58        |
| M06-2X       | ma-TZVP     | 1.03           | 27.26          | -26.23     | 4.83           | 10.72          | -5.89      | 5.67           | 11.08          | -5.41      | 0.91        |
| M08-HX       | ma-TZVP     | 2.29           | 28.68          | -26.39     | 6.27           | 10.94          | -4.67      | 7.12           | 11.42          | -4.29      | 1.14        |
| M08-SO       | ma-TZVP     | 0.95           | 27.37          | -26.42     | 5.48           | 9.33           | -3.85      | 6.44           | 9.82           | -3.38      | 1.61        |
| M05-2X       | ma-TZVP     | 1.15           | 28.89          | -27.74     | 5.07           | 9.44           | -4.37      | 5.82           | 9.74           | -3.92      | 1.13        |
| MN12-SX      | ma-TZVP     | 1.64           | 28.58          | -26.94     | 6.59           | 11.94          | -5.35      | 7.44           | 12.32          | -4.88      | 0.92        |
| MN12-L       | ma-TZVP     | 2.34           | 28.37          | -26.03     | 7.51           | 12.76          | -5.25      | 8.44           | 13.39          | -4.95      | 1.55        |
| MN15-L       | ma-TZVP     | 0.35           | 27.39          | -27.05     | 5.56           | 11.26          | -5.69      | 6.62           | 11.99          | -5.37      | 0.78        |
| MPW1K        | ma-TZVP     | 1.70           | 27.32          | -25.63     | 6.32           | 9.65           | -3.33      | 7.01           | 9.79           | -2.78      | 1.95        |
| CCSD(T)-F12b | jul-cc-PVTZ | 1.34           | 29.69          | -28.35     | 5.28           | 11.59          | -6.31      | 6.03           | 11.87          | -5.84      | 0.00        |

All the energies are with ZPEs excluded and calculated using the structures optimized by M08-HX/ma-TZVP method.

**Table S4** Classical forward barrier heights ( $V_f^\ddagger$ ), classical reverse barrier heights ( $V_r^\ddagger$ ) and classical reaction energies ( $\Delta V$ ) (in kcal/mol) of B1-B3 OH-addition reactions and the mean unsigned deviations (MUD in kcal/mol) against the benchmark results obtained by CCSD(T)-F12b/jul-cc-pVTZ//M08-HX/ma-TZVP.

| Method      | Basis set   | add- <i>ipso</i> |                |            | add- <i>o</i>  |                |            | add- <i>m</i>  |                |            | MUD         |
|-------------|-------------|------------------|----------------|------------|----------------|----------------|------------|----------------|----------------|------------|-------------|
|             |             | $V_f^\ddagger$   | $V_r^\ddagger$ | $\Delta V$ | $V_f^\ddagger$ | $V_r^\ddagger$ | $\Delta V$ | $V_f^\ddagger$ | $V_r^\ddagger$ | $\Delta V$ |             |
| M06-2X      | jul-cc-pVDZ | -2.65            | 20.73          | -23.38     | -2.65          | 19.71          | -21.18     | -0.62          | 21.06          | -21.67     | 0.95        |
| M08-HX      | jul-cc-pVDZ | -2.74            | 20.10          | -22.84     | -2.74          | 19.66          | -20.91     | -0.50          | 20.88          | -21.39     | 0.77        |
| M08-SO      | jul-cc-pVDZ | -4.88            | 19.05          | -23.93     | -4.88          | 18.80          | -22.14     | -2.55          | 20.19          | -22.74     | 1.44        |
| M05-2X      | jul-cc-pVDZ | -3.58            | 20.93          | -24.51     | -3.58          | 19.63          | -21.96     | -1.53          | 21.02          | -22.44     | 1.29        |
| MN12-SX     | jul-cc-pVDZ | -3.89            | 16.76          | -20.65     | -3.89          | 16.47          | -19.14     | -2.04          | 17.77          | -19.81     | 1.52        |
| MN12-L      | jul-cc-pVDZ | -3.51            | 14.93          | -18.45     | -3.51          | 14.82          | -16.62     | -1.24          | 16.04          | -17.14     | 2.77        |
| MN15-L      | jul-cc-pVDZ | -5.98            | 16.06          | -22.04     | -5.98          | 15.35          | -19.26     | -3.09          | 16.47          | -19.52     | 2.31        |
| MPW1K       | jul-cc-pVDZ | -1.98            | 19.15          | -21.12     | -1.98          | 18.51          | -19.58     | -0.58          | 21.22          | -20.30     | 0.85        |
| M06-2X      | ma-TZVP     | -2.04            | 20.37          | -22.42     | -2.04          | 19.40          | -20.22     | 0.02           | 20.69          | -20.66     | 0.70        |
| M08-HX      | ma-TZVP     | -1.02            | 19.82          | -20.84     | -1.02          | 19.37          | -18.83     | 1.30           | 20.53          | -19.23     | 1.47        |
| M08-SO      | ma-TZVP     | -3.27            | 19.21          | -22.48     | -3.27          | 18.82          | -20.48     | -0.89          | 20.16          | -21.00     | <b>0.54</b> |
| M05-2X      | ma-TZVP     | -2.90            | 20.54          | -23.44     | -2.90          | 19.28          | -20.90     | -0.85          | 20.51          | -21.29     | 0.73        |
| MN12-SX     | ma-TZVP     | -2.06            | 17.27          | -19.33     | -2.06          | 16.98          | -17.71     | -0.08          | 18.23          | -18.22     | 1.74        |
| MN12-L      | ma-TZVP     | -1.51            | 15.40          | -16.91     | -1.51          | 15.50          | -15.23     | 0.82           | 16.73          | -15.69     | 3.32        |
| MN15-L      | ma-TZVP     | -4.76            | 15.94          | -20.70     | -4.76          | 15.57          | -18.32     | -2.03          | 16.67          | -18.67     | 2.24        |
| MPW1K       | ma-TZVP     | -0.81            | 19.16          | -19.97     | -0.81          | 18.53          | -18.48     | 0.47           | 21.15          | -19.17     | 1.59        |
| CCSD(T)-F12 | jul-cc-PVTZ | -3.19            | 19.73          | -22.92     | -2.04          | 18.19          | -20.23     | -1.33          | 19.30          | -20.63     | 0.00        |

All the energies are with ZPEs excluded and calculated using the structures optimized by M08-HX/ma-TZVP method.

**Table S5** Classical forward barrier heights ( $V_f^\ddagger$ ) and classical reaction energies ( $\Delta V$ ) (kcal/mol) of B1-B3 addition reactions.<sup>a</sup>

| Reaction         | $V_f^\ddagger$            |                        |                        | $\Delta V$                |                        |                        |
|------------------|---------------------------|------------------------|------------------------|---------------------------|------------------------|------------------------|
|                  | Huang et al. <sup>b</sup> | This work <sup>c</sup> | This work <sup>d</sup> | Huang et al. <sup>b</sup> | This work <sup>c</sup> | This work <sup>d</sup> |
| add- <i>ipso</i> | -1.99                     | -1.61                  | -1.59                  | -14.68                    | -19.43                 | -19.87                 |
| add- <i>o</i>    | -1.90                     | -0.17                  | -0.60                  | -13.49                    | -17.65                 | -17.36                 |
| add- <i>m</i>    | -1.54                     | 0.22                   | -0.25                  | -14.23                    | -17.98                 | -17.60                 |

<sup>a</sup>All energies include scaled ZPEs.

<sup>b</sup> Calculated by the B3LYP/6-311++G(2df,2pd)//B3LYP/6-31G(d,p) method by Huang et. al.<sup>11</sup>

<sup>c</sup> Calculated by the M08-SO/ma-TZVP method.

<sup>d</sup> Calculated by the CCSD(T)-F12b/jul-cc-pVTZ//M08-HX/ma-TZVP method.

**Table S6** Multi-structural torsional anharmonicity factors  $F^{\text{MS-T},\alpha}$  for reactants, transition states and products of hydrogen abstraction reactions A1-A3 at selected temperatures by M08-HX/jul-cc-pVDZ method.

| T(K) | $F^{\text{MS-T,Reactants}}$ | $F^{\text{MS-T,TS}}$ |               |               | $F^{\text{MS-T,Products}}$ |               |               |
|------|-----------------------------|----------------------|---------------|---------------|----------------------------|---------------|---------------|
|      |                             | abs-methyl           | abs- <i>o</i> | abs- <i>m</i> | abs-methyl                 | abs- <i>o</i> | abs- <i>m</i> |
| 220  | 1.167                       | 2.592                | 2.298         | 1.905         | 1.031                      | 1.197         | 1.147         |
| 260  | 1.194                       | 2.852                | 2.300         | 1.866         | 1.046                      | 1.219         | 1.162         |
| 298  | 1.213                       | 3.073                | 2.284         | 1.823         | 1.059                      | 1.233         | 1.169         |
| 320  | 1.222                       | 3.189                | 2.269         | 1.797         | 1.067                      | 1.238         | 1.171         |
| 350  | 1.231                       | 3.333                | 2.244         | 1.760         | 1.077                      | 1.242         | 1.172         |
| 400  | 1.239                       | 3.538                | 2.192         | 1.697         | 1.093                      | 1.242         | 1.167         |
| 500  | 1.238                       | 3.829                | 2.069         | 1.572         | 1.118                      | 1.223         | 1.144         |
| 600  | 1.219                       | 3.992                | 1.934         | 1.455         | 1.134                      | 1.189         | 1.110         |
| 700  | 1.190                       | 4.059                | 1.798         | 1.347         | 1.143                      | 1.147         | 1.071         |
| 800  | 1.156                       | 4.058                | 1.666         | 1.248         | 1.146                      | 1.103         | 1.029         |
| 900  | 1.118                       | 4.009                | 1.543         | 1.157         | 1.144                      | 1.058         | 0.987         |
| 1000 | 1.080                       | 3.929                | 1.427         | 1.075         | 1.139                      | 1.013         | 0.946         |
| 1200 | 1.005                       | 3.717                | 1.225         | 0.931         | 1.122                      | 0.931         | 0.870         |
| 1400 | 0.935                       | 3.479                | 1.056         | 0.811         | 1.100                      | 0.858         | 0.802         |
| 1600 | 0.872                       | 3.242                | 0.916         | 0.711         | 1.077                      | 0.793         | 0.743         |
| 1800 | 0.816                       | 3.018                | 0.800         | 0.627         | 1.052                      | 0.737         | 0.690         |
| 2000 | 0.765                       | 2.811                | 0.704         | 0.557         | 1.028                      | 0.687         | 0.644         |
| 2300 | 0.699                       | 2.536                | 0.588         | 0.470         | 0.993                      | 0.624         | 0.585         |
| 2500 | 0.660                       | 2.374                | 0.525         | 0.423         | 0.971                      | 0.587         | 0.551         |
| 2800 | 0.609                       | 2.161                | 0.448         | 0.364         | 0.940                      | 0.539         | 0.507         |
| 3000 | 0.579                       | 2.035                | 0.405         | 0.331         | 0.920                      | 0.512         | 0.481         |



**Table S7** Multi-structural torsional anharmonicity factors  $F^{\text{MS-T},\alpha}$  for reactants, transition states and products of additional reactions B1-B3 at selected temperatures by M08-SO/ma-TZVP method.

| T(K) | $F^{\text{MS-T,Reactants}}$ | $F^{\text{MS-T,TS}}$   |                     |                     | $F^{\text{MS-T,Products}}$ |                     |                     |
|------|-----------------------------|------------------------|---------------------|---------------------|----------------------------|---------------------|---------------------|
|      |                             | <i>add-<i>ipso</i></i> | <i>add-<i>o</i></i> | <i>add-<i>m</i></i> | <i>add-<i>ipso</i></i>     | <i>add-<i>o</i></i> | <i>add-<i>m</i></i> |
| 220  | 1.156                       | 2.148                  | 2.304               | 2.406               | 2.274                      | 1.230               | 2.009               |
| 260  | 1.183                       | 2.241                  | 2.363               | 2.491               | 2.354                      | 1.205               | 1.975               |
| 298  | 1.202                       | 2.331                  | 2.400               | 2.548               | 2.428                      | 1.177               | 1.948               |
| 320  | 1.210                       | 2.382                  | 2.414               | 2.572               | 2.470                      | 1.161               | 1.936               |
| 350  | 1.218                       | 2.450                  | 2.425               | 2.595               | 2.526                      | 1.138               | 1.921               |
| 400  | 1.226                       | 2.553                  | 2.424               | 2.611               | 2.616                      | 1.101               | 1.903               |
| 500  | 1.223                       | 2.717                  | 2.369               | 2.579               | 2.775                      | 1.031               | 1.876               |
| 600  | 1.203                       | 2.820                  | 2.271               | 2.493               | 2.898                      | 0.968               | 1.847               |
| 700  | 1.173                       | 2.868                  | 2.153               | 2.381               | 2.982                      | 0.908               | 1.810               |
| 800  | 1.137                       | 2.873                  | 2.027               | 2.256               | 3.030                      | 0.853               | 1.763               |
| 900  | 1.099                       | 2.847                  | 1.903               | 2.129               | 3.046                      | 0.802               | 1.710               |
| 1000 | 1.060                       | 2.797                  | 1.785               | 2.006               | 3.037                      | 0.754               | 1.652               |
| 1200 | 0.985                       | 2.658                  | 1.570               | 1.778               | 2.965                      | 0.670               | 1.531               |
| 1400 | 0.915                       | 2.494                  | 1.388               | 1.581               | 2.850                      | 0.598               | 1.411               |
| 1600 | 0.852                       | 2.326                  | 1.234               | 1.412               | 2.713                      | 0.536               | 1.299               |
| 1800 | 0.796                       | 2.165                  | 1.104               | 1.268               | 2.569                      | 0.484               | 1.197               |
| 2000 | 0.746                       | 2.014                  | 0.994               | 1.146               | 2.426                      | 0.439               | 1.104               |
| 2300 | 0.680                       | 1.809                  | 0.859               | 0.994               | 2.222                      | 0.383               | 0.983               |
| 2500 | 0.642                       | 1.688                  | 0.784               | 0.909               | 2.096                      | 0.352               | 0.912               |
| 2800 | 0.592                       | 1.527                  | 0.690               | 0.803               | 1.922                      | 0.312               | 0.820               |
| 3000 | 0.563                       | 1.432                  | 0.637               | 0.742               | 1.817                      | 0.289               | 0.766               |

**Table S8** The calculated HPL rate constants for A1-A3 hydrogen abstraction reactions in  $\text{cm}^3\text{molecule}^{-1}\text{s}^{-1}$ .

| T(K) | Forward rate constants |               |               | Reverse rate constants |               |               |
|------|------------------------|---------------|---------------|------------------------|---------------|---------------|
|      | abs-methyl             | abs- <i>o</i> | abs- <i>m</i> | abs-methyl             | abs- <i>o</i> | abs- <i>m</i> |
| 220  | 7.49E-13               | 3.80E-16      | 2.72E-16      | 1.66E-41               | 5.82E-23      | 1.07E-22      |
| 260  | 7.43E-13               | 1.32E-15      | 9.42E-16      | 3.81E-37               | 1.64E-21      | 2.66E-21      |
| 298  | 8.12E-13               | 3.33E-15      | 2.39E-15      | 4.76E-34               | 1.79E-20      | 2.69E-20      |
| 320  | 8.71E-13               | 5.24E-15      | 3.78E-15      | 1.40E-32               | 5.60E-20      | 8.12E-20      |
| 350  | 9.69E-13               | 9.00E-15      | 6.56E-15      | 7.22E-31               | 2.14E-19      | 2.98E-19      |
| 400  | 1.17E-12               | 1.92E-14      | 1.42E-14      | 1.44E-28               | 1.32E-18      | 1.76E-18      |
| 500  | 1.70E-12               | 5.99E-14      | 4.59E-14      | 2.61E-25               | 1.85E-17      | 2.33E-17      |
| 600  | 2.36E-12               | 1.39E-13      | 1.09E-13      | 4.12E-23               | 1.17E-16      | 1.43E-16      |
| 700  | 3.19E-12               | 2.68E-13      | 2.16E-13      | 1.61E-21               | 4.69E-16      | 5.60E-16      |
| 800  | 4.17E-12               | 4.57E-13      | 3.77E-13      | 2.62E-20               | 1.40E-15      | 1.65E-15      |
| 900  | 5.34E-12               | 7.19E-13      | 6.07E-13      | 2.37E-19               | 3.40E-15      | 4.01E-15      |
| 1000 | 6.70E-12               | 1.06E-12      | 9.14E-13      | 1.42E-18               | 7.17E-15      | 8.47E-15      |
| 1200 | 1.01E-11               | 2.00E-12      | 1.80E-12      | 2.21E-17               | 2.35E-14      | 2.80E-14      |
| 1400 | 1.43E-11               | 3.32E-12      | 3.10E-12      | 1.69E-16               | 5.89E-14      | 7.10E-14      |
| 1600 | 1.96E-11               | 5.04E-12      | 4.86E-12      | 8.08E-16               | 1.23E-13      | 1.50E-13      |
| 1800 | 2.58E-11               | 7.16E-12      | 7.10E-12      | 2.84E-15               | 2.27E-13      | 2.81E-13      |
| 2000 | 3.31E-11               | 9.71E-12      | 9.86E-12      | 7.98E-15               | 3.81E-13      | 4.77E-13      |
| 2300 | 4.61E-11               | 1.43E-11      | 1.49E-11      | 2.80E-14               | 7.29E-13      | 9.25E-13      |
| 2500 | 5.63E-11               | 1.78E-11      | 1.90E-11      | 5.60E-14               | 1.05E-12      | 1.35E-12      |
| 2800 | 7.38E-11               | 2.39E-11      | 2.60E-11      | 1.35E-13               | 1.70E-12      | 2.20E-12      |
| 3000 | 8.70E-11               | 2.84E-11      | 3.12E-11      | 2.23E-13               | 2.24E-12      | 2.92E-12      |

**Table S9** The calculated HPL rate constants for B1-B3 OH-addition reactions ( $\text{cm}^3\text{molecule}^{-1}\text{s}^{-1}$  for forward reactions and  $\text{s}^{-1}$  for reverse reactions).

| T(K) | Forward rate constants |                     |                     | Reverse rate constants |                     |                     |
|------|------------------------|---------------------|---------------------|------------------------|---------------------|---------------------|
|      | <i>add-<i>ipso</i></i> | <i>add-<i>o</i></i> | <i>add-<i>m</i></i> | <i>add-<i>ipso</i></i> | <i>add-<i>o</i></i> | <i>add-<i>m</i></i> |
| 220  | 1.04E-11               | 3.33E-12            | 6.35E-13            | 5.78E-06               | 2.25E-04            | 3.02E-05            |
| 260  | 5.18E-12               | 2.42E-12            | 5.94E-13            | 3.93E-03               | 8.83E-02            | 1.70E-02            |
| 298  | 3.36E-12               | 2.03E-12            | 5.97E-13            | 3.96E-01               | 6.10E+00            | 1.50E+00            |
| 320  | 2.79E-12               | 1.90E-12            | 6.08E-13            | 3.51E+00               | 4.54E+01            | 1.25E+01            |
| 350  | 2.30E-12               | 1.78E-12            | 6.31E-13            | 4.45E+01               | 4.71E+02            | 1.48E+02            |
| 400  | 1.84E-12               | 1.69E-12            | 6.83E-13            | 1.34E+03               | 1.09E+04            | 4.03E+03            |
| 500  | 1.49E-12               | 1.68E-12            | 8.22E-13            | 1.61E+05               | 9.12E+05            | 4.20E+05            |
| 600  | 1.42E-12               | 1.80E-12            | 9.96E-13            | 3.96E+06               | 1.78E+07            | 9.35E+06            |
| 700  | 1.45E-12               | 1.98E-12            | 1.20E-12            | 3.90E+07               | 1.50E+08            | 8.59E+07            |
| 800  | 1.54E-12               | 2.20E-12            | 1.43E-12            | 2.17E+08               | 7.40E+08            | 4.53E+08            |
| 900  | 1.68E-12               | 2.45E-12            | 1.68E-12            | 8.22E+08               | 2.57E+09            | 1.64E+09            |
| 1000 | 1.83E-12               | 2.74E-12            | 1.95E-12            | 2.38E+09               | 6.95E+09            | 4.61E+09            |
| 1200 | 2.21E-12               | 3.38E-12            | 2.56E-12            | 1.17E+10               | 3.09E+10            | 2.15E+10            |
| 1400 | 2.66E-12               | 4.13E-12            | 3.26E-12            | 3.63E+10               | 8.96E+10            | 6.44E+10            |
| 1600 | 3.17E-12               | 4.96E-12            | 4.03E-12            | 8.44E+10               | 1.99E+11            | 1.46E+11            |
| 1800 | 3.73E-12               | 5.88E-12            | 4.88E-12            | 1.62E+11               | 3.69E+11            | 2.74E+11            |
| 2000 | 4.34E-12               | 6.89E-12            | 5.79E-12            | 2.74E+11               | 6.05E+11            | 4.54E+11            |
| 2300 | 5.36E-12               | 8.57E-12            | 7.32E-12            | 5.03E+11               | 1.08E+12            | 8.16E+11            |
| 2500 | 6.10E-12               | 9.78E-12            | 8.42E-12            | 6.94E+11               | 1.47E+12            | 1.11E+12            |
| 2800 | 7.30E-12               | 1.18E-11            | 1.02E-11            | 1.03E+12               | 2.15E+12            | 1.63E+12            |
| 3000 | 7.94E-12               | 1.32E-11            | 1.15E-11            | 1.25E+12               | 2.65E+12            | 2.01E+12            |

**Table S10** High-pressure-limit rate constants ( $k \times 10^{11} \text{ cm}^3\text{mole}^{-1}\text{s}^{-1}$ ) of addition reactions and overall reactions at 298 K.

|                             | Pan and Wang <sup>12</sup> (2015)      | This work <sup>a</sup> | Expt.                            |
|-----------------------------|----------------------------------------|------------------------|----------------------------------|
| $k_{\text{add}}^{\text{b}}$ | 0.176 <sup>c</sup> / 5.24 <sup>d</sup> | 0.598                  |                                  |
|                             |                                        | 0.680                  | $\sim 1.22 \pm 0.19^{\text{f}}$  |
| $k_{\text{all}}^{\text{e}}$ |                                        |                        | $\sim 1.143 \pm 0.34^{\text{g}}$ |
|                             |                                        |                        | $\sim 1.19 \pm 0.07^{\text{h}}$  |

<sup>a</sup> Our MS-CVT/SCT results based on M08-SO/ma-TZVP PESs;

<sup>b</sup> Total rate constant of addition reactions (B1-B3);

<sup>c</sup> TST result of Pan and Wang<sup>12</sup> based on M06-2X/6-311++G (2df, 2p) PESs;

<sup>d</sup> TST result of Pan and Wang<sup>12</sup> based on ROCBS-QB3 PESs;

<sup>e</sup> Total rate constant of H-abstraction (A1-A3) reactions and addition (B1-B3) reactions;

<sup>f</sup> Atkinson et al.<sup>13</sup> at 1 atm and  $296 \pm 2$  K in the air;

<sup>g</sup> Anderson et al.<sup>14</sup> at 760 Torr and room temperature in the air;

<sup>h</sup> Mehta et al.<sup>15</sup> at 8.0-8.1 Torr with He as bath gas.

**Table S11** The total rate constants of additional reactions (the sum of B1-B3 channels) under several selected pressures with He as the bath gas in  $\text{cm}^3\text{molecule}^{-1}\text{s}^{-1}$ .

| T(K) | 8 Torr   | 10 Torr  | 20 Torr  | 100 Torr | 1 atm    | 10 atm   | 100 atm  | 500 atm  |
|------|----------|----------|----------|----------|----------|----------|----------|----------|
| 220  | 1.42E-11 | 1.43E-11 | 1.43E-11 | 1.44E-11 | 1.44E-11 | 1.44E-11 | 1.44E-11 | 1.44E-11 |
| 260  | 7.94E-12 | 7.99E-12 | 8.09E-12 | 8.17E-12 | 8.19E-12 | 8.19E-12 | 8.20E-12 | 8.20E-12 |
| 298  | 5.46E-12 | 5.54E-12 | 5.73E-12 | 5.93E-12 | 5.98E-12 | 5.99E-12 | 5.99E-12 | 5.99E-12 |
| 320  | 4.52E-12 | 4.63E-12 | 4.89E-12 | 5.19E-12 | 5.28E-12 | 5.30E-12 | 5.30E-12 | 5.30E-12 |
| 350  | 3.50E-12 | 3.64E-12 | 4.00E-12 | 4.49E-12 | 4.68E-12 | 4.71E-12 | 4.71E-12 | 4.71E-12 |
| 400  | 2.14E-12 | 2.29E-12 | 2.74E-12 | 3.59E-12 | 4.08E-12 | 4.20E-12 | 4.21E-12 | 4.21E-12 |
| 500  | 5.29E-13 | 6.02E-13 | 8.76E-13 | 1.76E-12 | 3.01E-12 | 3.80E-12 | 3.98E-12 | 4.00E-12 |
| 600  | 7.80E-14 | 9.31E-14 | 1.58E-13 | 4.79E-13 | 1.42E-12 | 2.98E-12 | 3.95E-12 | 4.15E-12 |
| 700  | 8.30E-15 | 1.02E-14 | 1.91E-14 | 7.68E-14 | 3.64E-13 | 1.43E-12 | 3.21E-12 | 4.12E-12 |
| 800  | 7.55E-16 | 9.40E-16 | 1.85E-15 | 8.65E-15 | 5.53E-14 | 3.63E-13 | 1.55E-12 | 2.99E-12 |
| 900  | 6.40E-17 | 8.00E-17 | 1.60E-16 | 7.88E-16 | 5.76E-15 | 5.07E-14 | 3.62E-13 | 1.12E-12 |
| 1000 | 4.92E-18 | 6.15E-18 | 1.23E-17 | 6.15E-17 | 4.65E-16 | 4.55E-15 | 4.21E-14 | 1.82E-13 |
| 1200 | 1.65E-20 | 2.07E-20 | 4.14E-20 | 2.07E-19 | 1.57E-18 | 1.57E-17 | 1.57E-16 | 7.84E-16 |
| 1400 | 2.74E-23 | 3.42E-23 | 6.84E-23 | 3.42E-22 | 2.60E-21 | 2.60E-20 | 2.60E-19 | 1.30E-18 |
| 1600 | 3.26E-26 | 4.08E-26 | 8.16E-26 | 4.08E-25 | 3.10E-24 | 3.10E-23 | 3.10E-22 | 1.55E-21 |
| 1800 | 3.83E-29 | 4.78E-29 | 9.56E-29 | 4.78E-28 | 3.63E-27 | 3.63E-26 | 3.63E-25 | 1.82E-24 |
| 2000 | 5.05E-32 | 6.31E-32 | 1.26E-31 | 6.31E-31 | 4.80E-30 | 4.80E-29 | 4.80E-28 | 2.40E-27 |
| 2300 | 3.63E-36 | 4.53E-36 | 9.06E-36 | 4.53E-35 | 3.44E-34 | 3.44E-33 | 3.44E-32 | 1.72E-31 |
| 2500 | 8.37E-39 | 1.05E-38 | 2.09E-38 | 1.05E-37 | 7.95E-37 | 7.95E-36 | 7.95E-35 | 3.98E-34 |
| 2800 | 1.46E-42 | 1.82E-42 | 3.65E-42 | 1.82E-41 | 1.39E-40 | 1.39E-39 | 1.39E-38 | 6.93E-38 |
| 3000 | 6.08E-45 | 7.60E-45 | 1.52E-44 | 7.60E-44 | 5.77E-43 | 5.77E-42 | 5.77E-41 | 2.89E-40 |

**Table S12** The total rate constants of additional reactions (the sum of B1-B3 channels) under several selected pressures with Ar as the bath gas in  $\text{cm}^3\text{molecule}^{-1}\text{s}^{-1}$ .

| T(K) | 8 Torr   | 10 Torr  | 20 Torr  | 100 Torr | 1 atm    | 10 atm   | 100 atm  | 500 atm  |
|------|----------|----------|----------|----------|----------|----------|----------|----------|
| 220  | 1.43E-11 | 1.43E-11 | 1.43E-11 | 1.44E-11 | 1.44E-11 | 1.44E-11 | 1.44E-11 | 1.44E-11 |
| 260  | 8.01E-12 | 8.04E-12 | 8.12E-12 | 8.18E-12 | 8.19E-12 | 8.19E-12 | 8.20E-12 | 8.20E-12 |
| 298  | 5.59E-12 | 5.65E-12 | 5.80E-12 | 5.94E-12 | 5.98E-12 | 5.99E-12 | 5.99E-12 | 5.99E-12 |
| 320  | 4.70E-12 | 4.79E-12 | 5.00E-12 | 5.22E-12 | 5.29E-12 | 5.30E-12 | 5.30E-12 | 5.30E-12 |
| 350  | 3.74E-12 | 3.86E-12 | 4.16E-12 | 4.55E-12 | 4.69E-12 | 4.71E-12 | 4.71E-12 | 4.71E-12 |
| 400  | 2.42E-12 | 2.57E-12 | 3.00E-12 | 3.74E-12 | 4.12E-12 | 4.20E-12 | 4.21E-12 | 4.21E-12 |
| 500  | 6.87E-13 | 7.76E-13 | 1.10E-12 | 2.06E-12 | 3.23E-12 | 3.86E-12 | 3.99E-12 | 4.00E-12 |
| 600  | 1.14E-13 | 1.35E-13 | 2.25E-13 | 6.42E-13 | 1.73E-12 | 3.27E-12 | 4.04E-12 | 4.18E-12 |
| 700  | 1.27E-14 | 1.56E-14 | 2.89E-14 | 1.12E-13 | 4.99E-13 | 1.77E-12 | 3.53E-12 | 4.27E-12 |
| 800  | 1.21E-15 | 1.50E-15 | 2.94E-15 | 1.36E-14 | 8.39E-14 | 5.12E-13 | 1.95E-12 | 3.43E-12 |
| 900  | 1.04E-16 | 1.30E-16 | 2.60E-16 | 1.28E-15 | 9.24E-15 | 7.89E-14 | 5.24E-13 | 1.50E-12 |
| 1000 | 8.07E-18 | 1.01E-17 | 2.02E-17 | 1.01E-16 | 7.60E-16 | 7.39E-15 | 6.68E-14 | 2.77E-13 |
| 1200 | 2.71E-20 | 3.39E-20 | 6.78E-20 | 3.39E-19 | 2.58E-18 | 2.58E-17 | 2.57E-16 | 1.28E-15 |
| 1400 | 4.46E-23 | 5.58E-23 | 1.12E-22 | 5.58E-22 | 4.24E-21 | 4.24E-20 | 4.24E-19 | 2.12E-18 |
| 1600 | 5.30E-26 | 6.63E-26 | 1.33E-25 | 6.63E-25 | 5.04E-24 | 5.04E-23 | 5.04E-22 | 2.52E-21 |
| 1800 | 6.19E-29 | 7.73E-29 | 1.55E-28 | 7.73E-28 | 5.88E-27 | 5.88E-26 | 5.88E-25 | 2.94E-24 |
| 2000 | 8.14E-32 | 1.02E-31 | 2.04E-31 | 1.02E-30 | 7.73E-30 | 7.73E-29 | 7.73E-28 | 3.87E-27 |
| 2300 | 5.82E-36 | 7.27E-36 | 1.45E-35 | 7.27E-35 | 5.53E-34 | 5.53E-33 | 5.53E-32 | 2.76E-31 |
| 2500 | 1.34E-38 | 1.67E-38 | 3.35E-38 | 1.67E-37 | 1.27E-36 | 1.27E-35 | 1.27E-34 | 6.36E-34 |
| 2800 | 2.33E-42 | 2.91E-42 | 5.82E-42 | 2.91E-41 | 2.21E-40 | 2.21E-39 | 2.21E-38 | 1.11E-37 |
| 3000 | 9.68E-45 | 1.21E-44 | 2.42E-44 | 1.21E-43 | 9.19E-43 | 9.19E-42 | 9.19E-41 | 4.60E-40 |

**Table S13** The overall rate constants ( $k \times 10^{12} \text{ cm}^3\text{mole}^{-1}\text{s}^{-1}$ ) at 298 K, 320 K, and 800 K under the same or similar pressure conditions.

| $T$<br>$p$                    | 298 K                     |                        | 320 K    |                        | 800 K                          |
|-------------------------------|---------------------------|------------------------|----------|------------------------|--------------------------------|
|                               | 100 Torr                  | 1 atm                  | 100 Torr | 1 atm                  | 1 atm                          |
| This work (He)                | 6.74                      | 6.80                   | 6.07     | 6.16                   | 5.06                           |
| This work (Ar)                | 6.76                      | 6.80                   | 6.10     | 6.17                   | 5.09                           |
| Hansen et al. <sup>16</sup>   | 15.3±1.5<br>(101<br>Torr) |                        |          |                        |                                |
| Perry et al. <sup>17</sup>    | 14.3±1.5                  |                        | 14.0±1.5 |                        |                                |
| Nicovich et al. <sup>18</sup> |                           | 14.2±1.7<br>(800 Torr) |          | 15.8±1.8<br>(800 Torr) | 10.20±0.91<br>(800 Torr, 757K) |
| Anderson et al. <sup>14</sup> |                           | 11.43±0.34             |          |                        |                                |
| Atkinson et al. <sup>13</sup> |                           | 12.2±1.9               |          |                        |                                |

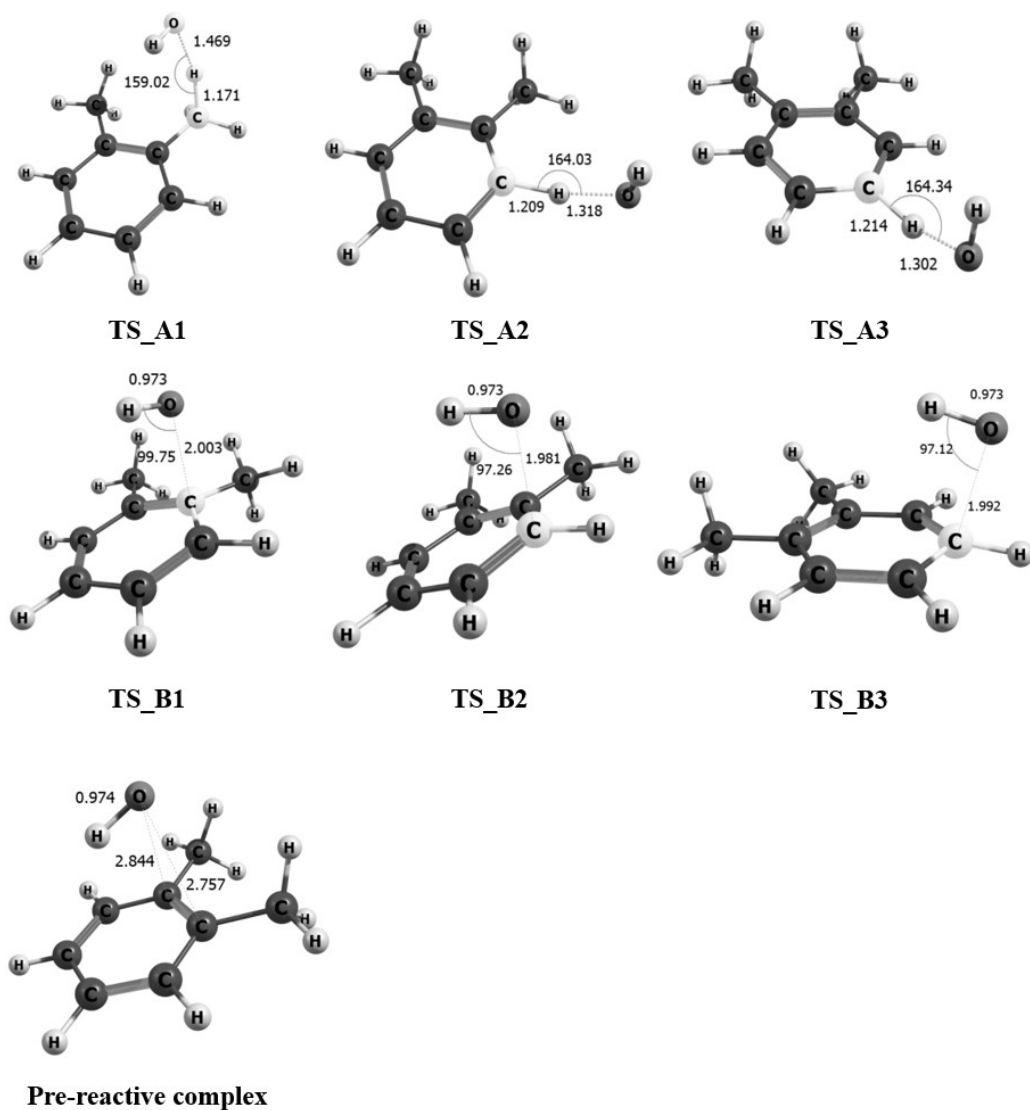

**Fig. S1** The optimized lowest-energy transition state structures of *o*-xylene reactions with OH for A1-A3 channels by M08-HX/jul-cc-pVDZ method, and for B1-B3 channels by M08-SO/ma-TZVP method. The structure of the pre-reactive complex is optimized by M08-HX/ma-TZVP method. Bond distances are given in Å.



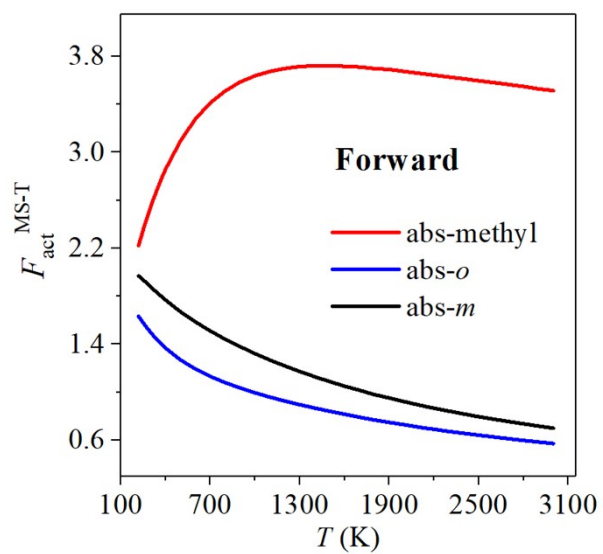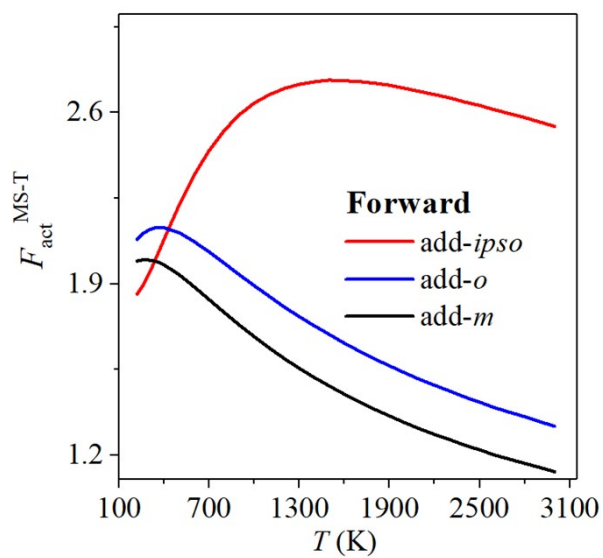

**Fig. S2** The multi-structural anharmonicity factor  $F_{\text{act}}^{\text{MS-T}}$  for hydrogen abstraction and addition reactions.

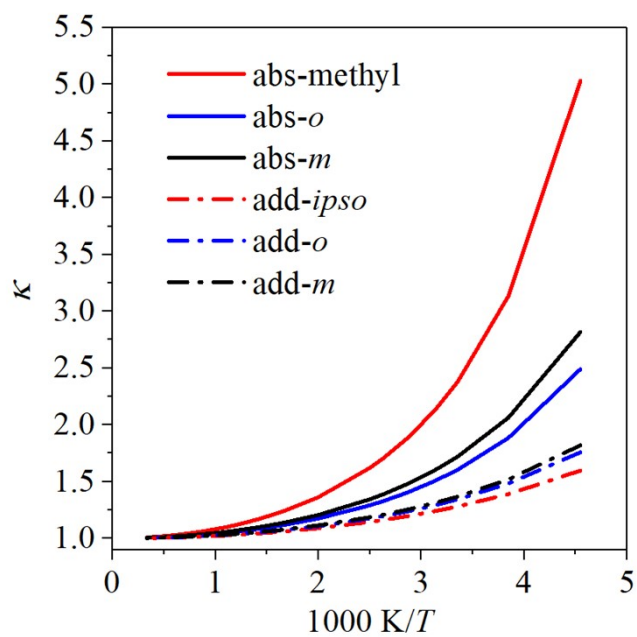

**Fig. S3** Small-curvature tunneling transmission coefficients ( $\kappa^{\text{SCT}}$ ) for A1-A3 and B1-B3 reactions in the high-pressure limit. Straight and dash-dot lines represent results for hydrogen abstraction reactions by M08-HX/jul-cc-pVDZ and addition reactions by M08-SO/ma-TZVP, respectively.

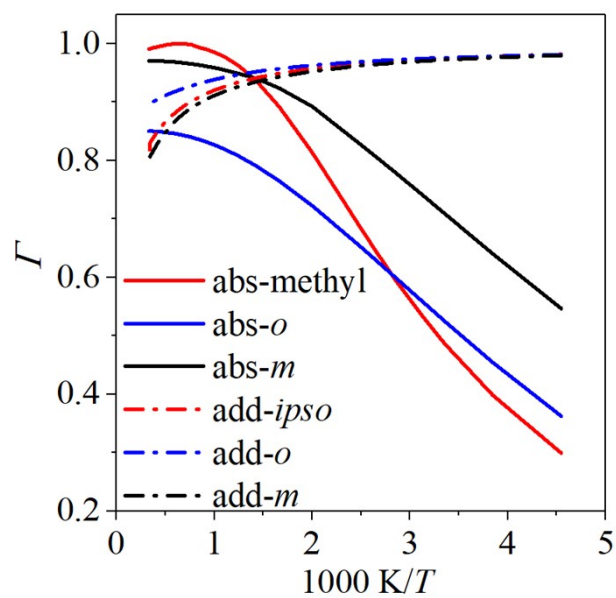

**Fig. S4** Recrossing transmission coefficients ( $\Gamma^{\text{CVT}}$ ) for A1-A3 and B1-B3 reactions. Straight and dash-dot lines represent results for hydrogen abstraction reactions by M08-HX/jul-cc-pVDZ and addition reactions by M08-SO/ma-TZVP, respectively.

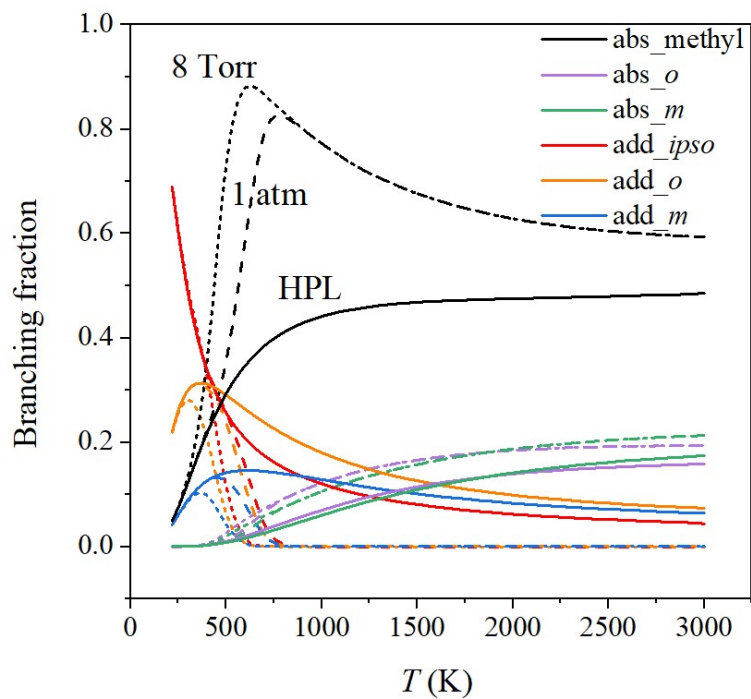

**Fig. S5** Branching fractions of six reaction channels with the bath gas of He. The dot lines, dash lines and solid lines represent the branching fractions under the pressure condition of 8 torr, 1 atm and HPL, respectively.

## References

1. I. M. Alecu, J. Zheng, Y. Zhao and D. G. Truhlar, *J. Chem. Theory Comput.*, 2010, **6**, 2872-2887.
2. L. G. Gao, J. Zheng, A. Fernández-Ramos, D. G. Truhlar and X. Xu, *J. Am. Chem. Soc.*, 2018, **140**, 2906-2918.
3. J. Zheng, R. Meana-Pañeda and D. G. Truhlar, *J. Am. Chem. Soc.*, 2014, **136**, 5150-5160.
4. R. M. Zhang, D. G. Truhlar and X. Xu, *Research (Washington)*, 2019, **2019**, 1-19.
5. J. Bloino, M. Biczysko and V. Barone, *J. Chem. Theory Comput.*, 2012, **8**, 1015-1036.
6. K. M. Kuhler, D. G. Truhlar and A. D. Isaacson, *J. Chem. Phys.*, 1996, **104**, 4664-4671.
7. H. H. Nielsen, *The Vibration-rotation Energies of Molecules and their Spectra in the Infra-red.*, Springer-Verlag OHG, Berlin · Göttingen · Heidelberg, 1959.
8. Q. Zhang, P. N. Day and D. G. Truhlar, *J. Chem. Phys.*, 1993, **98**, 4948-4958.
9. I. M. Mills, *Vibration-Rotation Structure in Asymmetric- and Symmetric-Top Molecules*, Academic: New York, 1972.
10. B. J. Lynch, P. L. Fast, M. Harris and D. G. Truhlar, *J. Phys. Chem. A*, 2000, **104**, 4811-4815.
11. M. Huang, W. Zhang, Z. Wang, L. Hao, W. Zhao, X. Liu, B. Long and L. Fang, *Int. J. Quantum Chem.*, 2008, **108**, 954-966.
12. S.-S. Pan and L.-M. Wang, *Acta Physico-Chimica Sinica*, 2015, **31**, 2259-2268.
13. R. Atkinson and S. M. Aschmann, *Int. J. Chem. Kinet.*, 1989, **21**, 355-365.
14. R. S. Anderson, E. Czuba, D. Ernst, L. Huang, A. E. Thompson and J. Rudolph, *J. Phys. Chem. A*, 2003, **107**, 6191-6199.
15. D. Mehta, A. Nguyen, A. Montenegro and Z. Li, *J. Phys. Chem. A*, 2009, **113**, 12942-12951.
16. D. A. Hansen, R. Atkinson and J. N. Pitts Jr, *J. Phys. Chem.*, 1975, **79**, 1763-1766.
17. R. A. Perry, R. Atkinson and J. N. Pitts Jr, *J. Phys. Chem.*, 1977, **81**, 296-304.
18. J. M. Nicovich, R. L. Thompson and A. R. Ravishankara, *J. Phys. Chem.*, 1981, **85**, 2913-2916.
